# Supplementary material for: Efficacy of Dequalinium Chloride vs Metronidazole for the Treatment of Bacterial Vaginosis: A Randomized Clinical Trial
Source: PubMed Central journal article supplement — JAMA Netw Open. 2024 May 2;7(5):e248661. doi: 10.1001/jamanetworkopen.2024.8661 (PMC11066704; doi:10.1001/jamanetworkopen.2024.8661), 2024-05-02
Supplement: jamanetwopen-e248661-s002.pdf [file jamanetwopen-e248661-s002.pdf]

## Supplementary Online Content

Raba G, Ďurkech A, Malík T, Bassfeld D, Grob P, Hurtado-Chong A. Efficacy of dequalinium chloride vs metronidazole for the treatment of bacterial vaginosis: a randomized clinical trial. *JAMA Netw Open*. 2024;7(5):e248661. doi:10.1001/jamanetworkopen.2024.8661

**eTable.** Subgroup Analyses Stratified by Nugent Score

This supplementary material has been provided by the authors to give readers additional information about their work.

**eTable.** Subgroup Analyses Stratified by Nugent Score

| <b>Nugent BV+</b>           |                                                                 |                                                          |                                                      |                |
|-----------------------------|-----------------------------------------------------------------|----------------------------------------------------------|------------------------------------------------------|----------------|
| <b>Visit</b>                | <b>Dequalinium chloride<br/>n<sup>a</sup>/N<sup>b</sup> (%)</b> | <b>Metronidazole<br/>n<sup>a</sup>/N<sup>b</sup> (%)</b> | <b>Treatment difference<br/>(95% CI<sup>c</sup>)</b> | <b>p-value</b> |
| Visit 1 (ITT <sup>d</sup> ) | 35/37 (94.6)                                                    | 36/40 (90.0)                                             | 4.6 (-10.2, 19.4)                                    | 0.004          |
| Visit 1 (PP <sup>e</sup> )  | 29/30 (96.7)                                                    | 25/29 (86.2)                                             | 10.5 (-6.9, 27.8)                                    | 0.002          |
| Visit 2 (ITT <sup>d</sup> ) | 28/37 (75.7)                                                    | 36/39 (92.3)                                             | -16.6 (-32.7, -0.6)                                  | 0.57           |
| <b>Nugent Intermediate</b>  |                                                                 |                                                          |                                                      |                |
| <b>Visit</b>                | <b>Dequalinium chloride<br/>n<sup>a</sup>/N<sup>b</sup> (%)</b> | <b>Metronidazole<br/>n<sup>a</sup>/N<sup>b</sup> (%)</b> | <b>Treatment difference<br/>(95% CI<sup>c</sup>)</b> | <b>p-value</b> |
| Visit 1 (ITT <sup>d</sup> ) | 13/15 (86.7)                                                    | 10/10 (100)                                              | -13.3 (-31.4, 4.7)                                   | 0.42           |
| Visit 2 (ITT <sup>d</sup> ) | 13/15 (86.7)                                                    | 5/8 (62.5)                                               | 24.2 (-10.5, 58.9)                                   | 0.01           |
| <b>Nugent Normal</b>        |                                                                 |                                                          |                                                      |                |
| <b>Visit</b>                | <b>Dequalinium chloride<br/>n<sup>a</sup>/N<sup>b</sup> (%)</b> | <b>Metronidazole<br/>n<sup>a</sup>/N<sup>b</sup> (%)</b> | <b>Treatment difference<br/>(95% CI<sup>c</sup>)</b> | <b>p-value</b> |
| Visit 1 (ITT <sup>d</sup> ) | 16/17 (94.1)                                                    | 22/23 (95.7)                                             | -1.5 (-20.9, 17.8)                                   | 0.08           |
| Visit 2 (ITT <sup>d</sup> ) | 14/17 (82.4)                                                    | 20/23 (87.0)                                             | -4.6 (-28.7, 19.5)                                   | 0.19           |

The Nugent BV<sup>+</sup> subgroup would correspond to the modified intention-to-treat, the original primary efficacy population before the protocol amendment. The analyses at Visit 1 would correspond to the primary endpoint and are therefore presented using the intention-to-treat and per-protocol populations. The rest of the analyses are presented using only the intention-to-treat population.

Visit 1= 7-11 days after treatment start, Visit 2= 20-40 days after treatment start

<sup>a</sup>n= number of cured

<sup>b</sup>N= number of patients in the respective treatment arm with non-missing values

<sup>c</sup>CI= confidence interval

<sup>d</sup>ITT= intention to treat

<sup>e</sup>PP= per protocol

CI and p-value based on Farrington-Manning test with a one-sided  $\alpha = 0.025$  and a non-inferiority margin of 15%
