# Supplementary material for: Efficacy of Dequalinium Chloride vs Metronidazole for the Treatment of Bacterial Vaginosis: A Randomized Clinical Trial
Source: PubMed Central journal article supplement — JAMA Netw Open. 2024 May 2;7(5):e248661. doi: 10.1001/jamanetworkopen.2024.8661 (PMC11066704; doi:10.1001/jamanetworkopen.2024.8661), 2024-05-02
Supplement: jamanetwopen-e248661-s003.pdf [file jamanetwopen-e248661-s003.pdf]

| <b>*Group Name(s): Fluomizin Study Group</b> |                       |                              |                  |                                                  |                                          |                                                         |                                                                                            |
|----------------------------------------------|-----------------------|------------------------------|------------------|--------------------------------------------------|------------------------------------------|---------------------------------------------------------|--------------------------------------------------------------------------------------------|
| <b>*First Name and Middle Initial(s)</b>     | <b>*Last Name</b>     | <b>*Suffix (eg, Jr, III)</b> | Academic Degrees | Institution                                      | Location (city, state/province, country) | Role or Contribution, eg, chair, principal investigator | Group (if more than 1 Group listed in the byline) and/or Subgroup (eg, Steering Committee) |
| Simona                                       | Botta                 |                              | M.Sc.            | GCP-Service International LTd.&Co.KG             | 28359 Bremen, Germany                    | Data analysis                                           |                                                                                            |
| Alexander                                    | Sach                  |                              | M.Sc.            | Medinova AG                                      | 8050 Zurich, Switzerland                 | Review manuscript                                       |                                                                                            |
| Magdalena                                    | Golańska - Wróblewska |                              | MD               | Salve Medica Sp. z o. o. S. K.                   | 91-211 Łódź, Poland                      | Investigator- data collection                           |                                                                                            |
| Miloš                                        | Paškala               |                              | MD               | GYNAMA s.r.o.                                    | 91501 Nove Mesto nad Vahom, Slovakia     | Investigator- data collection                           |                                                                                            |
| Katarzyna                                    | Romanek-Piva          |                              | MD               | 1 Wojskowy Szpital Kliniczny z Polikliniką SPZOZ | 20-049 Lublin, Poland                    | Investigator- data collection                           |                                                                                            |
| Radmila                                      | Sládičeková           |                              | MD               | RADMA GYN s.r.o                                  | 85105 Bratislava, Slovakia               | Investigator- data collection                           |                                                                                            |
| Aleš                                         | Skřivánek             |                              | MD               | G-CENTRUM Olomouc s.r.o.                         | 772 00 Olomouc, Czech Republic           | Investigator- data collection                           |                                                                                            |
| Petr                                         | Sudek                 |                              | MD               | Gynekologicko-porodnická ambulance               | 400 01 Ústí nad Labem, Czech Republic    | Investigator- data collection                           |                                                                                            |
