# Supplementary material for: Efficacy of Dequalinium Chloride vs Metronidazole for the Treatment of Bacterial Vaginosis: A Randomized Clinical Trial
Source: PubMed Central journal article supplement — JAMA Netw Open. 2024 May 2;7(5):e248661. doi: 10.1001/jamanetworkopen.2024.8661 (PMC11066704; doi:10.1001/jamanetworkopen.2024.8661), 2024-05-02
Supplement: jamanetwopen-e248661-s004.pdf [file jamanetwopen-e248661-s004.pdf]

## Data Sharing Statement

Raba. Efficacy of Dequalinium Chloride vs Metronidazole for the Treatment of Bacterial Vaginosis. *JAMA Netw Open*. Published May 02, 2024.

doi:10.1001/jamanetworkopen.2024.8661

### Data

**Data available:** Yes

**Data types:** Deidentified participant data

**How to access data:** Relevant de-identified patient level data may be made available upon reasonable request

**When available:** With publication

### Supporting Documents

**Document types:** None

### Additional Information

**Who can access the data:** Relevant de-identified patient level data may be made available upon reasonable request

**Types of analyses:** Research purposes

**Mechanisms of data availability:** With a signed data access agreement and approval of a proposal
